# Supplementary material for: Morphological transitions of axially-driven microfilaments
Source: Royal Society of Chemistry journal article supplement (doi:10.1039/c8sm02397b), 2019-01-01
Supplement: c8sm02397b6.pdf [file c8sm02397b6.pdf]

## Morphological transitions of axially-driven microfilaments

Yi Man and Eva Kanso

Aerospace and Mechanical engineering, University of Southern California, CA 90089

### Supplemental Materials

We derived an elasto-hydrodynamic model of a filament driven by active force with an arbitrary force profile. The governing equations in dimensionless form is

$$\theta_t = -\theta_{ssss} - \Lambda\theta_{ss} - \left(1 + \frac{1}{\gamma}\right)\Lambda_s\theta_s + 3\left(1 + \frac{1}{\gamma}\right)\theta_s^2\theta_{ss} + \frac{1}{\gamma}f_{\parallel}\theta_s + \frac{\partial f_{\perp}}{\partial s}, \quad (1a)$$

$$\Lambda_{ss} - \gamma\theta_s^2\Lambda = 3\theta_{ss}^2 + (3 + \gamma)\theta_s\theta_{sss} - \gamma\theta_s^4 + \frac{\partial f_{\parallel}}{\partial s} - \gamma f_{\perp}\theta_s. \quad (1b)$$

The boundary conditions for the filament with free-ends are given by the moment- and force-free conditions at both ends  $s = 0$  and  $s = 1$ , leading to

$$\theta_s(0) = \theta_{ss}(0) = \theta_s(1) = \theta_{ss}(1) = 0, \quad (2a)$$

$$\Lambda(0) = \Lambda(1) = 0. \quad (2b)$$

We consider a force at  $s = s_p$  acting along the local tangential direction, with force profile given by a Dirac delta function,

$$f_{\parallel} = f_p\delta(s - s_p), \quad f_{\perp} = 0. \quad (3)$$

We discretize the arc length  $s$  uniformly into  $N$  segments and apply the second-order central difference formulae for all the derivatives of  $\theta$  and  $\Lambda$ , in the bulk,

$$(X_s)_j = \frac{1}{2\Delta s}(-X_{j-1} + X_{j+1}), \quad (4a)$$

$$(X_{ss})_j = \frac{1}{\Delta s^2}(X_{j-1} - X_j + X_{j+1}), \quad (4b)$$

$$(X_{ssss})_j = \frac{1}{\Delta s^4}(X_{j-2} - 4X_{j-1} + 6X_j - 4X_{j+1} + X_{j+2}), \quad (4c)$$

where  $\Delta s = 1/N$ ,  $j = 2, 3, \dots, N$ , and  $X$  represents either  $\theta$  or  $\Lambda$ . At the boundaries, the discretization is

$$(X_s)_1 = \frac{1}{2\Delta s}(-3X_1 + 4X_2 - X_3), \quad (5a)$$

$$(X_{ss})_1 = \frac{1}{\Delta s^2}(2X_1 - 5X_2 + 4X_3 - X_4), \quad (5b)$$

$$(X_s)_{N+1} = \frac{1}{2\Delta s}(3X_{N+1} - 4X_N + X_{N-1}), \quad (5c)$$

$$(X_{ss})_{N+1} = \frac{1}{\Delta s^2}(2X_{N+1} - 5X_N + 4X_{N-1} - X_{N-2}). \quad (5d)$$

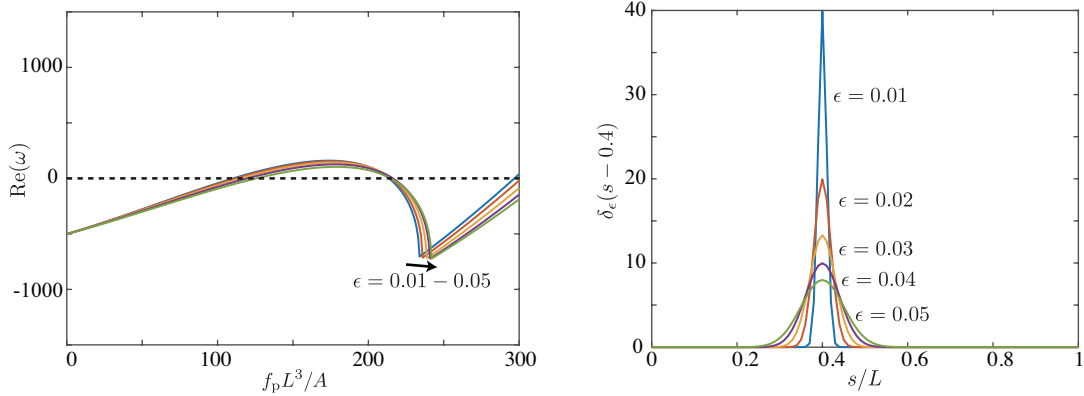

FIG. 1. Left: Real part of dominant eigenvalues when  $s_p = 0.4$ , with regularization coefficient  $\epsilon = 0.01 - 0.05$ . Right: Regularized Dirac delta function with  $\epsilon = 0.01 - 0.05$ .

At each time step, we first calculate the tension  $\Lambda$  from (1b), then march (1a) in time with a modified Crank-Nicolson method. We treat the linear terms implicitly and the nonlinear terms explicitly. At time step  $k$ , the discrete equations are given by

$$\Lambda_{ss}^k - \gamma (\theta_s^k)^2 \Lambda^k = 3(\theta_{ss}^k)^2 + (3 + \gamma)\theta_s^k \theta_{sss}^k - \gamma(\theta_s^k)^4 + f_p \frac{\partial \delta(s - s_p)}{\partial s} \quad (6a)$$

$$\begin{aligned} \frac{\theta^{k+1} - \theta^k}{\Delta t} = & -\frac{1}{2} (\theta_{ssss}^k + \theta_{ssss}^{k+1}) - \frac{1}{2} [\Lambda^k (\theta_{ss}^k + \theta_{ss}^{k+1})] \\ & -\frac{1}{2}(1 + \gamma^{-1}) [\Lambda_s^k (\theta_s^k + \theta_s^{k+1})] + \frac{3}{2}(1 + \gamma^{-1}) [(\theta_s^k)^2 (\theta_{ss}^k + \theta_{ss}^{k+1})] \\ & + \frac{1}{2\gamma} f_p \delta(s - s_p) (\theta_s^k + \theta_s^{k+1}). \end{aligned} \quad (6b)$$

We use  $N = 100$  in our simulations, the time step is around  $10^{-4}$ . To avoid the singularity, the Dirac delta function is regularized using the regularization function

$$\delta_\epsilon(x) \approx \frac{1}{\sqrt{2\pi\epsilon}} e^{-\frac{x^2}{2\epsilon^2}}. \quad (7)$$

In Fig. 1, we calculate the eigenvalues for  $s_p = 0.4$  (shown in Fig. 5 of the main document) with regularization coefficient  $\epsilon = 0.01 - 0.05$ . Clearly, the instability features are not affected qualitatively by the exact value of  $\epsilon$ . In the main document, we set  $\epsilon = 0.01$  throughout.

We next choose a finer discretization  $N = 200$  with  $\epsilon = 0.01$ . The results show the same level of accuracy, see Fig. 2.

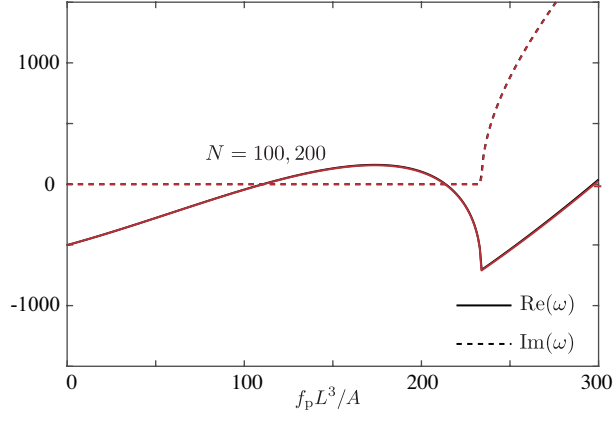

FIG. 2. Dominant eigenvalues when  $s_p = 0.4$ , with regularization coefficient  $\epsilon = 0.01$ . Two sets of line overlap, with number of discretization  $N = 100$  and  $200$  respectively.
